# Supplementary material for: A novel variant in the GNE gene in a Malian patient presenting with distal myopathy
Source: Research Square preprint supplement (doi:10.21203/rs.3.rs-4004982/v1), 2024-03-07
Supplement: Supplementary file 2 [file c47a14d6a656928e8ef257dd.docx]

**Table S1:** Characteristics of the variant c.1838G>A; p.Gly613Glu in the *GNE* gene

| Tools | Score | Prediction |
| --- | --- | --- |
| CADD | 29 | Pathogenic |
| BayesDel addAF | 0.5736 | Pathogenic strong |
| DEOGEN2 | 0.9079 | Pathogenic moderate |
| EIGEN | 0.9994 | Pathogenic moderate |
| M CAP | 0.8849 | Pathogenic moderate |
| Mutation assessor | 4.065 | Pathogenic moderate |
| MetaLR | 0.9945 | Pathogenic strong |
| SIFT | 0 | Deleterious |
| PolyPhen | 1 | Probably damaging |
| MutPred | 0;811 | Pathogenic moderate |
| FATHMM | -4.63 | Pathogenic supporting |
| ACMG criteria | PP3, PM1, PM2, PP1 | Likely pathogenic |
